# Supplementary material for: Mechanisms of Tumor Necrosis Factor-Alpha Inhibitor-Induced Systemic Lupus Erythematosus
Source: Frontiers journal article supplement (doi:10.3389/fmed.2022.870724), 2022-06-06
Supplement: Data_Sheet_2.pdf [file Data_Sheet_2.pdf]

## Appendix B

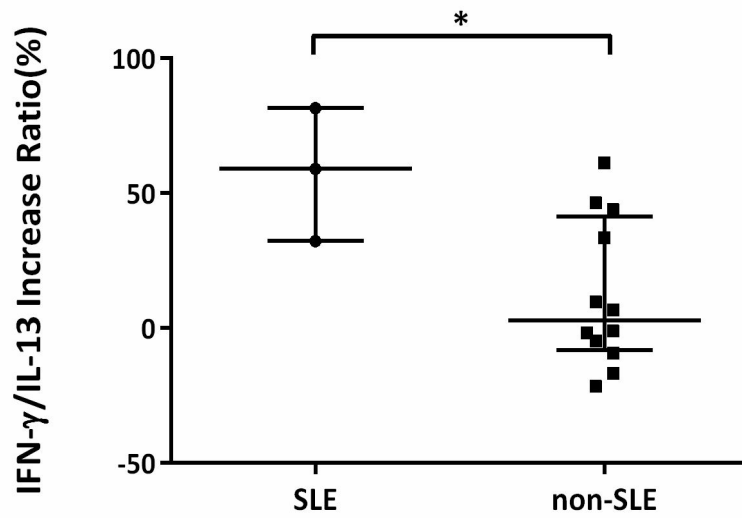

Fig. S1. Increased IFN- $\gamma$ /IL-13 ratio in PSO and PSA patients with systemic lupus erythematosus (SLE). Three patients with SLE and four patients with PSO+PSA without SLE (P4, P6, P7, P8) and 15 treatment courses of biologics were as follow adalimumab, 6; etanercept, 1; golimumab, 1; ustekinumab, 3; secukinumab, 3; and guselkumab, 1. The ratio of IFN- $\gamma$ /IL13 was significantly increased in the SLE group ( $p=0.02$ ).
